# Supplementary material for: Re-Emergence of Salmonellosis in Hog Farms: Outbreak and Bacteriological Characterization
Source: MDPI journal article supplement (doi:10.3390/microorganisms9050947), 2021-04-27

**Dendrogram of monophasic variant of *S. Typhimurium* isolates according to pulsotype, outbreak location, and antimicrobial resistance profile**

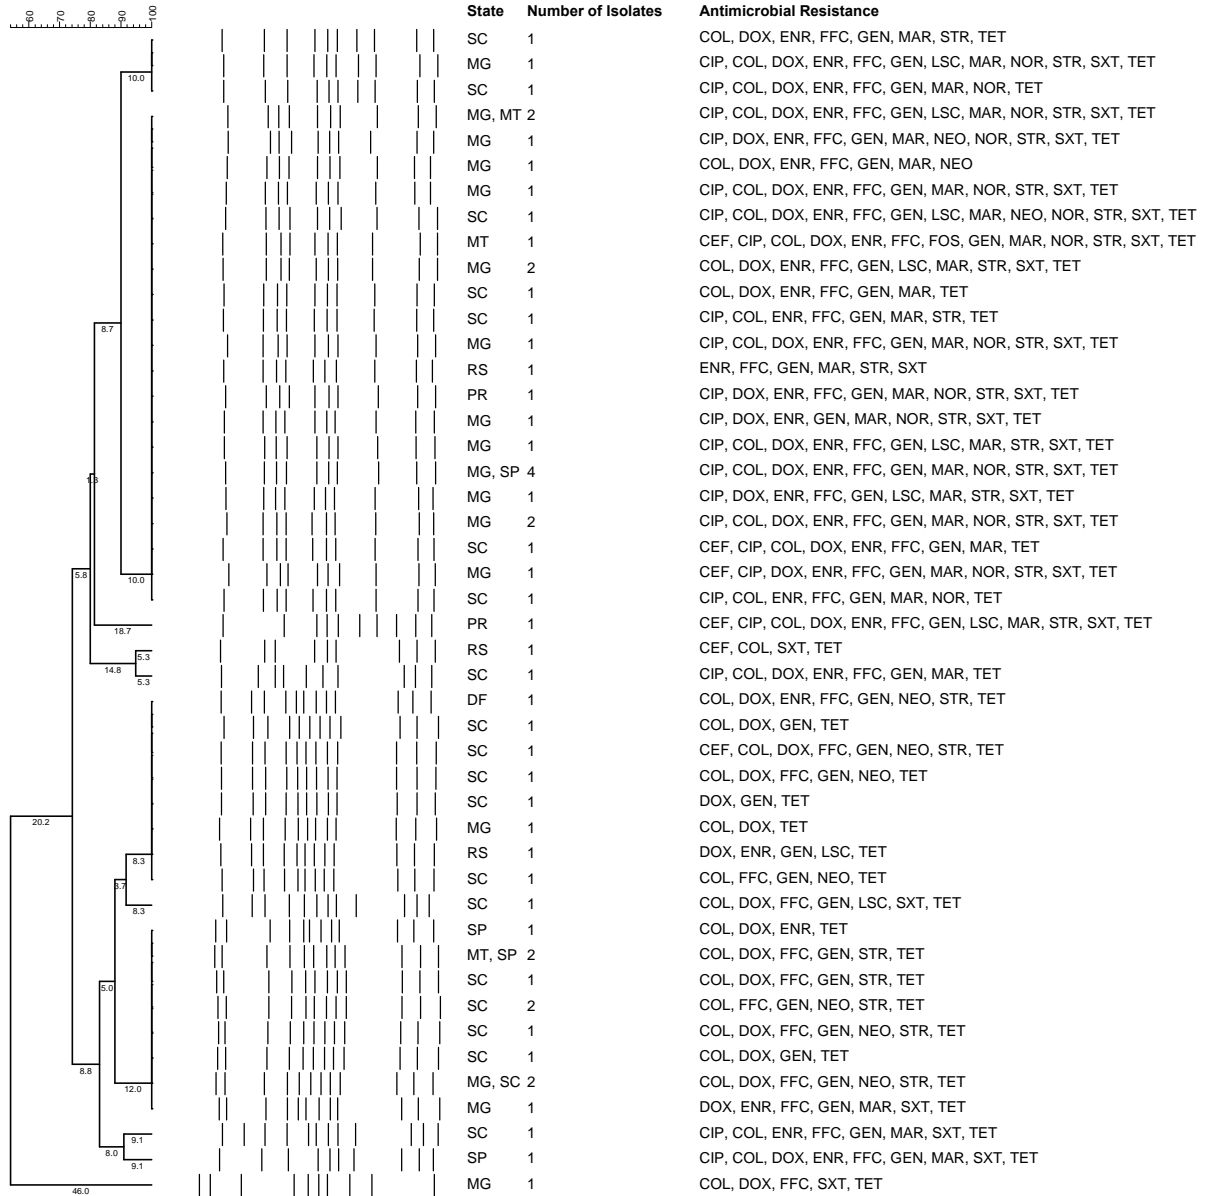

Supplement: s1 [file s1]
