# Supplementary material for: Re-Emergence of Salmonellosis in Hog Farms: Outbreak and Bacteriological Characterization
Source: MDPI journal article supplement (doi:10.3390/microorganisms9050947), 2021-04-27
Supplement: s1 [file s1]

**Dendrogram of 130 *Salmonella* isolates according to pulsotype, outbreak location, serovar antimicrobial resistance profile**

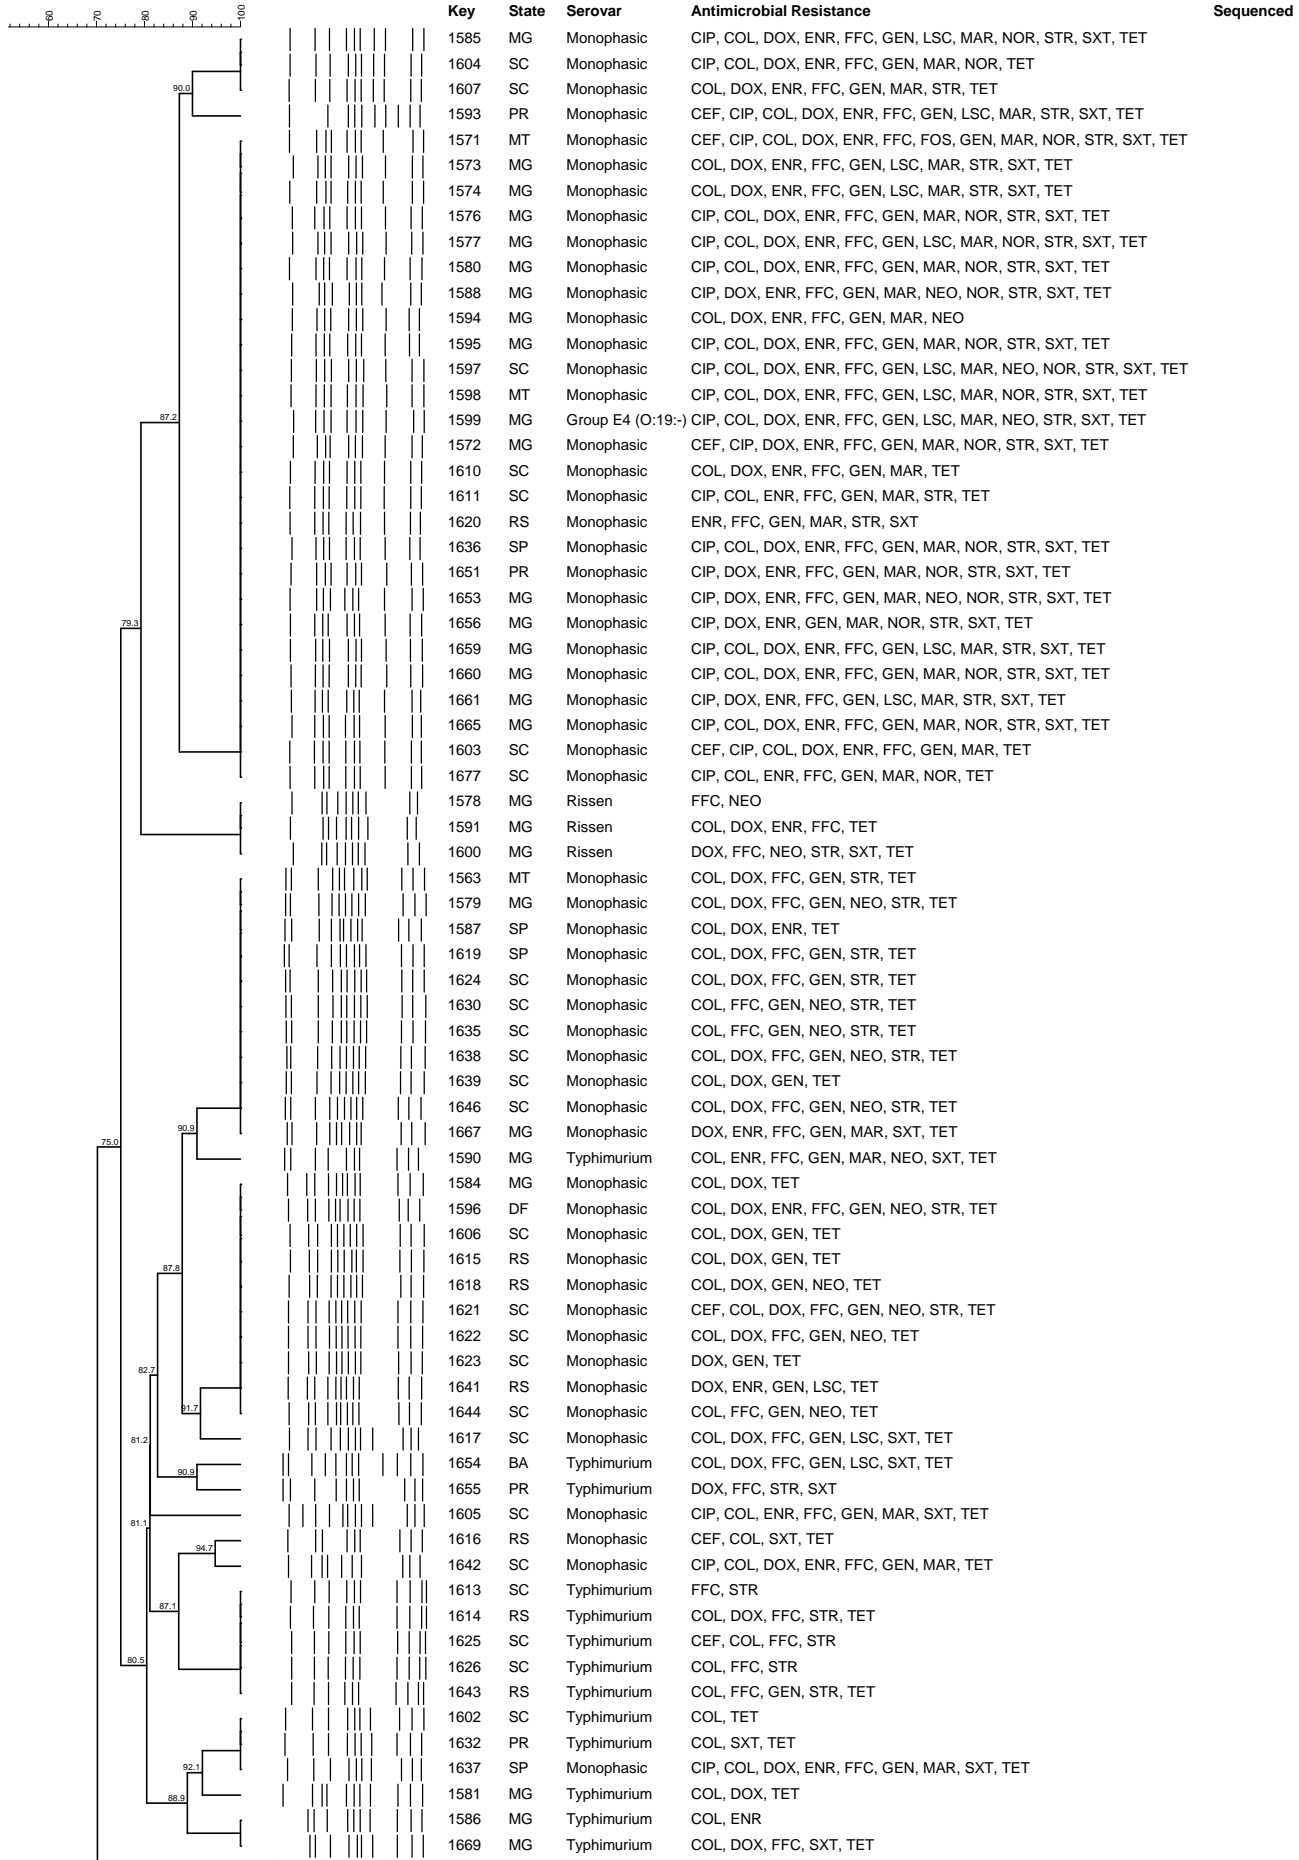

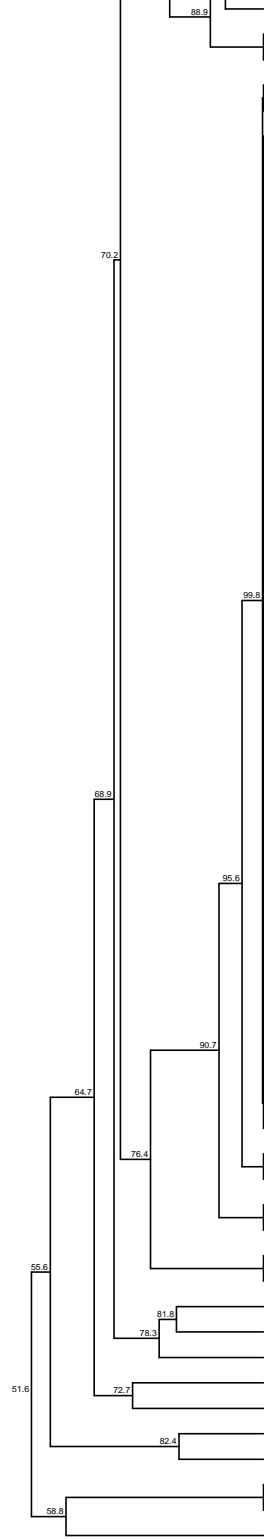

|      |    |                   |                                        |   |
|------|----|-------------------|----------------------------------------|---|
| 1581 | MG | Typhimurium       | COL, DOX, TET                          |   |
| 1586 | MG | Typhimurium       | COL, ENR                               |   |
| 1669 | MG | Typhimurium       | COL, DOX, FFC, SXT, TET                |   |
| 1561 | MG | Choleraesuis      | COL, DOX, FFC, GEN, LSC, STR, TET      | X |
| 1566 | MG | Choleraesuis      | DOX, FFX, GEN, MAR, NEO, STR, TET      |   |
| 1544 | MG | Choleraesuis      | DOX, FFC, GEN, STR, TET                |   |
| 1548 | PR | Choleraesuis      | DOX, FFC, GEN, STR, TET                |   |
| 1549 | PR | Choleraesuis      | DOX, FFC, GEN, STR, TET                |   |
| 1551 | PR | Choleraesuis      | DOX, FFC, GEN, TET                     |   |
| 1554 | MG | Choleraesuis      | DOX, FFC, GEN, STR, TET                |   |
| 1547 | SP | Choleraesuis      | DOX, ENR, FFC, GEN, STR, TET           |   |
| 1556 | SP | Choleraesuis      | DOX, FFC, GEN, STR, TET                | X |
| 1557 | SP | Choleraesuis      | COL, DOX, FFC, GEN, STR, TET           |   |
| 1558 | MG | Choleraesuis      | DOX, FFC, GEN, STR, TET                |   |
| 1559 | MG | Choleraesuis      | FFC, GEN, STR, TET                     |   |
| 1560 | MG | Choleraesuis      | DOX, FFC, GEN, STR, TET                |   |
| 1550 | PR | Choleraesuis      | DOX, FFC, GEN, STR, TET                | X |
| 1567 | MG | Choleraesuis      | DOX, FFC, GEN, STR, TET                |   |
| 1553 | SP | Choleraesuis      | DOX, FFC, GEN, STR, TET                |   |
| 1570 | MG | Choleraesuis      | DOX, ENR, FFC, GEN, STR, TET           |   |
| 1555 | SP | Choleraesuis      | DOX, ENR, FFC, GEN, STR, TET           |   |
| 1575 | MG | Choleraesuis      | DOX, ENR, FFC, GEN, STR, TET           |   |
| 1583 | GO | Choleraesuis      | COL, DOX, ENR, FOS, GEN, MAR, STR, TET | X |
| 1552 | SP | Choleraesuis      | COL, DOX, FFC, GEN, STR, TET           |   |
| 1543 | MG | Choleraesuis      | DOX, FFC, GEN, STR, TET                |   |
| 1601 | RS | Choleraesuis      | DOX, FFC, GEN, STR, TET                |   |
| 1608 | SC | Choleraesuis      | COL, DOX, TET                          |   |
| 1612 | PR | Choleraesuis      | COL, FFC, STR, TET                     |   |
| 1627 | SC | Choleraesuis      | COL, DOX, FFC, GEN, TET                |   |
| 1628 | PR | Choleraesuis      | TET                                    |   |
| 1631 | RS | Choleraesuis      | ENR, FFC, GEN, STR                     | X |
| 1633 | SC | Choleraesuis      | COL, DOX, GEN, FFC, STR, TET           | X |
| 1649 | MG | Choleraesuis      | COL, DOX, FFC, TET                     |   |
| 1650 | PR | Choleraesuis      | DOX, FFC, GEN, TET                     |   |
| 1657 | MG | Choleraesuis      | DOX, FFC, GEN, TET                     |   |
| 1658 | MG | Choleraesuis      | DOX, FFC, TET                          |   |
| 1673 | SC | Choleraesuis      | DOX, STR, TET                          |   |
| 1674 | SC | Choleraesuis      | DOX, GEN, STR, TET                     |   |
| 1675 | RS | Choleraesuis      | DOX, FFC, GEN, STR, TET                |   |
| 1676 | RS | Choleraesuis      | DOX, FFC, GEN, STR, TET                |   |
| 1565 | SC | Choleraesuis      | COL, DOX, ENR, FOS, GEN, MAR, STR, TET |   |
| 1542 | MG | Choleraesuis      | DOX, ENR, FFC, GEN, MAR, STR, TET      |   |
| 1568 | MG | Choleraesuis      | DOX, ENR, FFC, GEN, NEO, STR, TET      |   |
| 1647 | MG | Choleraesuis      | COL, DOX, ENR, FFC, STR, TET           |   |
| 1640 | SC | Choleraesuis      | COL, DOX, FFX, GEN, STR, TET           |   |
| 1546 | NI | Choleraesuis      | DOX, ENR, FFC, GEN, STR, TET           |   |
| 1672 | SC | Choleraesuis      | DOX, NEO                               |   |
| 1545 | NI | Choleraesuis      | COL, DOX, ENR, FFC, GEN, STR, TET      |   |
| 1541 | NI | Choleraesuis      | ENR, NEO                               |   |
| 1652 | SP | London            | DOX, FFC, GEN, SXT, TET                |   |
| 1662 | MG | London            | COL, ENR, FFC, GEN, LSC, STR, SXT, TET |   |
| 1634 | SC | Anatum            | COL, GEN, STR, TET                     |   |
| 1666 | MS | Infantis          | COL, FFC, TET                          |   |
| 1582 | MG | Derby             | COL, NEO, TET                          |   |
| 1589 | MG | Group D           | COL, DOX, TET                          |   |
| 1668 | PR | Newport           | NONE                                   |   |
| 1569 | MG | Monophasic        | COL, DOX, FFC, SXT, TET                |   |
| 1592 | NI | Bovinsmorbificans | COL                                    |   |
| 1564 | MG | Panama            | COL, DOX, FFC, GEN, LSC, STR, TET      |   |
| 1664 | MG | Panama            | COL, DOX, FFC, TET                     |   |
| 1648 | MG | Oslo              | CEF, COL, ENR, FFC, NEO                |   |
